23. McCann B, Miaskowski C, Koetters T, Baggott C, West C, Levine JD, Elboim C, Abrams G, Hamolsky D, Dunn L, Rugo H, Dodd M, Paul SM, Neuhaus J, Cooper B, Schmidt B, Langford D, Cataldo J, Aouizerat BE: Associations between pro- and anti-inflammatory cytokine genes and breast pain in women prior to breast cancer surgery. *J Pain* 2012; 13:425–37
24. Shi Y, Weingarten TN, Mantilla CB, Hooten WM, Warner DO: Smoking and pain: Pathophysiology and clinical implications. *ANESTHESIOLOGY* 2010; 113:977–92
25. Kim H, Neubert JK, San Miguel A, Xu K, Krishnaraju RK, Iadarola MJ, Goldman D, Dionne RA: Genetic influence on variability in human acute experimental pain sensitivity associated with gender, ethnicity and psychological temperament. *Pain* 2004; 109:488–96
26. Saari TI, Ihmsen H, Neuvonen PJ, Olkkola KT, Schwilden H: Oxycodone clearance is markedly reduced with advancing age: A population pharmacokinetic study. *Br J Anaesth* 2012; 108:491–8
27. Werner MU, Mjöbo HN, Nielsen PR, Rudin A: Prediction of postoperative pain: A systematic review of predictive experimental pain studies. *ANESTHESIOLOGY* 2010; 112:1494–502
28. Strulov L, Zimmer EZ, Granot M, Tamir A, Jakobi P, Lowenstein L: Pain catastrophizing, response to experimental heat stimuli, and post-cesarean section pain. *J Pain* 2007; 8:273–9
29. Granot M, Lowenstein L, Yarnitsky D, Tamir A, Zimmer EZ: Postcesarean section pain prediction by preoperative experimental pain assessment. *ANESTHESIOLOGY* 2003; 98:1422–6
30. Werner MU, Duun P, Kehlet H: Prediction of postoperative pain by preoperative nociceptive responses to heat stimulation. *ANESTHESIOLOGY* 2004; 100:115–9; discussion 5A
31. Martinez V, Fletcher D, Bouhassira D, Sessler DI, Chauvin M: The evolution of primary hyperalgesia in orthopedic surgery: Quantitative sensory testing and clinical evaluation before and after total knee arthroplasty. *Anesth Analg* 2007; 105:815–21

## ANESTHESIOLOGY REFLECTIONS FROM THE WOOD LIBRARY-MUSEUM

### Colon-Morales' Uterine Displacement Device

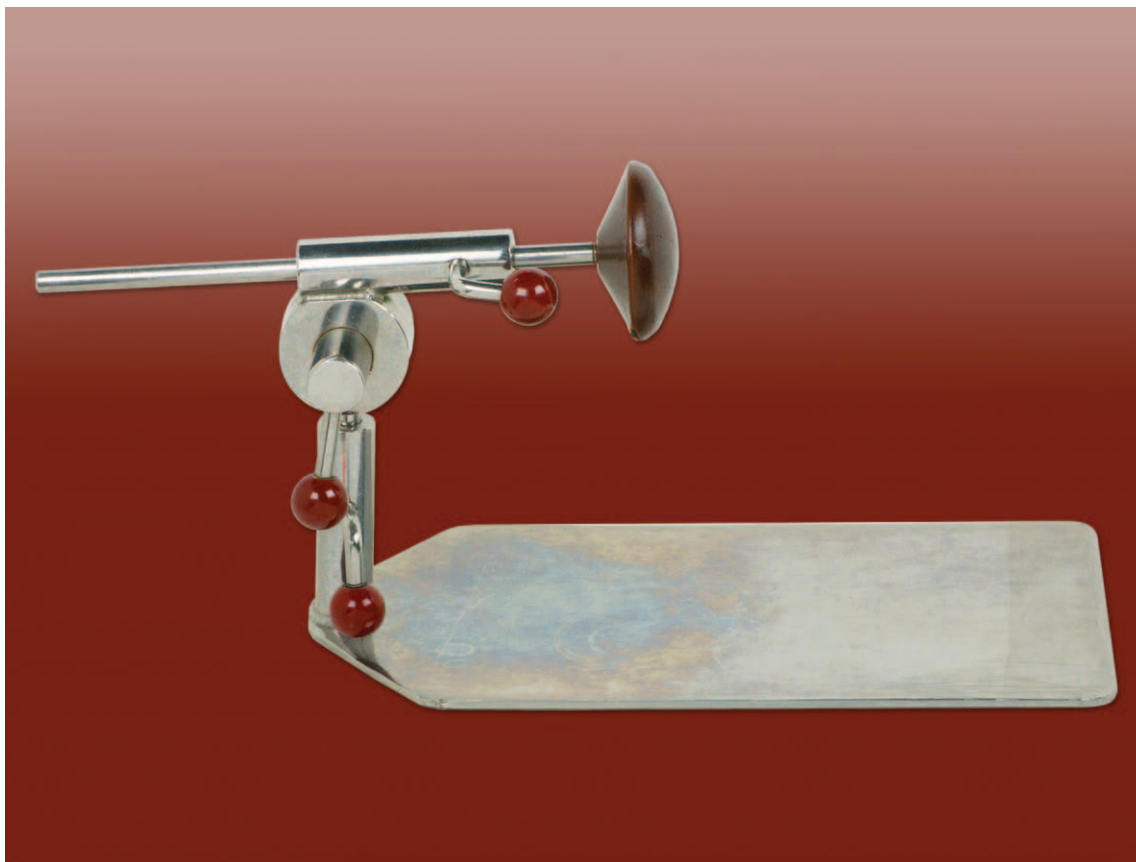

When a pregnant woman lies flat on her back, the heavy contents of her distended womb can compress one or both of her abdomen's largest blood vessels (inferior vena cava and/or aorta). Besides alarming symptoms, maternal hypotension and even fetal demise can then occur. To help prevent this "supine hypotensive syndrome," Dr. Miguel A. Colon-Morales invented a uterine displacement device (above), which can be attached to (or slid under the padding of) the surgical table. To shift the gravid uterus to the patient's left and avoid compressing central vessels, a 10-inch rod is extended so that its terminal plunger ball is "placed in the space between the last floating rib and the right iliac crest." On June, 13, 1972, Dr. Colon-Morales was granted U.S. Patent No. 3669118 for his clever "Uterine Displacement Device." (Copyright © the American Society of Anesthesiologists, Inc.)

George S. Bause, M.D., M.P.H., *Honorary Curator, ASA's Wood Library-Museum of Anesthesiology, Park Ridge, Illinois, and Clinical Associate Professor, Case Western Reserve University, Cleveland, Ohio.* UJYC@aol.com.
